# Supplementary material
Source: PubMed Central journal article supplement (PMC6124520)
Supplement: jciinsight-3-121479-s118.pdf [file jciinsight-3-121479-s118.pdf]

El Boustany and coworkers.

**Plasma copeptin and chronic kidney disease risk in 3 European cohorts from the general population**

**SUPPLEMENTAL MATERIAL**

|                                                                                                                                                                       |   |
|-----------------------------------------------------------------------------------------------------------------------------------------------------------------------|---|
| Supplemental Acknowledgements.....                                                                                                                                    | 2 |
| Supplemental Table 1: Characteristics of participants at baseline by CKD status during follow-up.....                                                                 | 3 |
| Supplemental Table 2. Incidence of eGFR outcomes during follow-up by tertiles of baseline plasma copeptin - Data from individual cohorts.....                         | 5 |
| Supplemental Table 3: Incidence of eGFR outcomes (CKD-EPI cystatin C equation) during follow-up in the PREVEND cohort by tertiles of plasma copeptin at baseline..... | 6 |
| Supplemental Table 4: Incidence of eGFR outcomes during follow-up in men by tertiles of plasma copeptin at baseline.....                                              | 7 |
| Supplemental Table 5: Incidence of eGFR outcomes during follow-up in women by tertiles of plasma copeptin at baseline.....                                            | 8 |

**Supplemental Acknowledgements**

The DESIR Study Group. INSERM U1018: B. Balkau, P. Ducimetière, E. Eschwège; INSERM U367: F. Alhenc-Gelas; CHU D'Angers: Y Gallois, A. Girault; Centre de Recherche des Cordeliers, INSERM U1138, Bichat Hospital: F. Fumeron, M. Marre, R Roussel; CHU de Rennes: F. Bonnet; CNRS UMR8090, Lille: A. Fonnebond, S. Cauchi, P. Froguel; Centres d'Examens de Santé: Alençon, Angers, Blois, Caen, Chateauroux, Chartres, Cholet, Le Mans, Orléans, Tours; Institute de Recherche Médecine Générale: J. Cogneau; General practitioners of the region; Institute inter-Regional pour la Santé: C. Born, E. Caces, M. Cailleau, O Lantieri, J.G. Moreau, F. Rakotozafy, J. Tichet, S. Vol.

**Supplemental Table 1: Characteristics of participants at baseline by CKD status during follow-up.**

|                                   | CKD stage 3 (eGFR<60 ml/min/1.73 m <sup>2</sup> ) |                  |         | KDIGO “Certain drop in eGFR” |                  |         |
|-----------------------------------|---------------------------------------------------|------------------|---------|------------------------------|------------------|---------|
|                                   | progressors                                       | non-progressors  | p       | progressors                  | non-progressors  | p       |
| n                                 | 1124                                              | 11909            |         | 1233                         | 12364            |         |
| Age (years)                       | 59 ± 7                                            | 49 ± 10          | <0.0001 | 55 ± 10                      | 50 ± 11          | <0.0001 |
| Sex: men                          | 486 (43.2%)                                       | 5667 (47.6%)     | 0.005   | 544 (44.1%)                  | 5771 (46.7%)     | 0.09    |
| BMI (Kg/m <sup>2</sup> )          | 26.1 ± 4.0                                        | 25.3 ± 3.9       | <0.0001 | 26.0 ± 4.3                   | 25.4 ± 3.9       | <0.0001 |
| SBP (mmHg)                        | 142 ± 21                                          | 130 ± 18         | <0.0001 | 139 ± 22                     | 131 ± 18         | <0.0001 |
| DBP (mmHg)                        | 84 ± 10                                           | 78 ± 11          | <0.0001 | 82 ± 11                      | 78 ± 11          | <0.0001 |
| Antihypertensive treatment        | 283 (25.2%)                                       | 1149 (9.6%)      | <0.0001 | 275 (22.3%)                  | 1326 (10.7%)     | <0.0001 |
| Use of ACE-I or ARBs              | 88 (7.8%)                                         | 349 (2.9%)       | <0.0001 | 88 (7.1%)                    | 400 (3.2%)       | <0.0001 |
| Use of diuretics                  | 83 (7.4%)                                         | 296 (2.5%)       | <0.0001 | 83 (6.7%)                    | 358 (2.9%)       | <0.0001 |
| eGFR (mL/min/1.73m <sup>2</sup> ) | 74 ± 9.9                                          | 92 ± 15          | <0.0001 | 86 ± 17                      | 88 ± 16          | <0.0001 |
| ACR (µg/mg creatinine)            | 9.3 (14.3)                                        | 6.8 (6.6)        | <0.0001 | 9.3 (14.2)                   | 6.8 (6.7)        | <0.0001 |
| FPG (mmol/L)                      | 5.20 ± 1.33                                       | 5.03 ± 1.00      | <0.0001 | 5.27 ± 1.55                  | 5.03 ± 0.96      | <0.0001 |
| Glycaemic status: NFG/IFG/DM (%)  | 90.8 / 4.5 / 4.6                                  | 93.4 / 4.1 / 2.6 | 0.0002  | 89.5 / 4.8 / 5.8             | 93.4 / 4.2 / 2.5 | <0.0001 |
| Current smoker                    | 282 (25.1%)                                       | 3415 (28.7%)     | 0.01    | 334 (27.1%)                  | 3462 (28.0%)     | 0.50    |
| Total cholesterol (mmol/L)        | 6.09 ± 1.05                                       | 5.71 ± 1.07      | <0.0001 | 5.91 ± 1.14                  | 5.76 ± 1.08      | <0.0001 |
| LDL cholesterol (mmol/L)          | 4.08 ± 0.95                                       | 3.73 ± 0.95      | <0.0001 | 3.93 ± 1.03                  | 3.78 ± 0.96      | 0.0004  |

|                          |             |             |         |             |             |         |
|--------------------------|-------------|-------------|---------|-------------|-------------|---------|
| HDL cholesterol (mmol/L) | 1.43 ± 0.42 | 1.46 ± 0.42 | 0.03    | 1.41 ± 0.42 | 1.46 ± 0.42 | <0.0001 |
| Triglycerides (mmol/L)   | 1.40 ± 0.88 | 1.28 ± 0.97 | <0.0001 | 1.37 ± 0.90 | 1.29 ± 0.96 | <0.0001 |
| Plasma copeptin (pmol/L) |             |             |         |             |             |         |
| Men                      | 7.23 (6.23) | 5.68 (4.83) | <0.0001 | 6.97 (5.57) | 5.76 (4.98) | <0.0001 |
| Women                    | 4.05 (3.40) | 3.41 (2.81) | <0.0001 | 3.87 (3.30) | 3.46 (2.87) | <0.0001 |

Data from pooled cohorts, expressed as mean ± SD or percent (number), except ACR and plasma copeptin expressed as median (interquartile range). Statistics for quantitative parameters are ANOVA with log-transformed data or Wilcoxon (rank sums) test (eGFR and ACR) and for qualitative variables, Pearson's chi-squared test. ACR: albumin to creatinine ratio assessed only in DESIR and PREVEND cohorts. FPG: fasting plasma glucose, NFG: normal fasting glucose, IFG: impaired fasting glucose, DM: diabetes mellitus. SBP, DBP: systolic and diastolic blood pressure, ACE-I: Angiotensin converting enzyme Inhibitors, ARBs: Angiotensin receptor blockers. eGFR was calculated using the CKD-EPI creatinine equation. Progression towards CKD defined as eGFR below 60 ml/min/1.73 m<sup>2</sup> (CKD stage 3) in at least one of the follow-up visits (non-progression defined as eGFR equal or above this value at all visits) or by the KDIGO criterion "*Certain drop in eGFR*".

**Supplemental Table 2. Incidence of eGFR outcomes during follow-up by tertiles of baseline plasma copeptin - Data from individual cohorts**

|                             | CKD stage 3 (eGFR<60 ml/min/1.73m <sup>2</sup> ) |         | KDIGO “Certain drop in eGFR” |        |
|-----------------------------|--------------------------------------------------|---------|------------------------------|--------|
|                             | HR (95% CI)                                      | p       | OR (95% CI)                  | p      |
| <b>DESIR</b>                |                                                  |         |                              |        |
| T3 vs. T1                   | 1.36 (1.02-1.83)                                 | 0.03    | 1.52 (1.14-2.04)             | 0.004  |
| T3 vs. T2                   | 1.06 (0.79-1.41)                                 | 0.69    | 0.93 (0.71-1.21)             | 0.59   |
| T2 vs. T1                   | 1.29 (0.97-1.73)                                 | 0.07    | 1.64 (1.24-2.18)             | 0.0005 |
| Log <sub>e</sub> [copeptin] | 1.30 (1.06-1.60)                                 | 0.01    | 1.32 (1.07-1.63)             | 0.008  |
| <b>MDCS-CC</b>              |                                                  |         |                              |        |
| T3 vs. T1                   | 1.57 (1.27-1.94)                                 | <0.0001 | 1.48 (1.16-1.91)             | 0.002  |
| T3 vs. T2                   | 1.25 (1.02-1.52)                                 | 0.03    | 1.14 (0.90-1.44)             | 0.28   |
| T2 vs. T1                   | 1.26 (1.01-1.57)                                 | 0.04    | 1.30 (1.01-1.68)             | 0.04   |
| Log <sub>e</sub> [copeptin] | 1.23 (1.11-1.38)                                 | <0.0001 | 1.32 (1.13-1.56)             | 0.0006 |
| <b>PREVEND</b>              |                                                  |         |                              |        |
| T3 vs. T1                   | 1.42 (1.08-1.89)                                 | 0.01    | 1.62 (1.25-2.10)             | 0.0003 |
| T3 vs. T2                   | 1.58 (2.22-1.07)                                 | 0.0006  | 1.45 (1.13-1.85)             | 0.003  |
| T2 vs. T1                   | 0.90 (0.67-1.22)                                 | 0.49    | 1.12 (0.85-1.47)             | 0.44   |
| Log <sub>e</sub> [copeptin] | 1.30 (1.08-1.56)                                 | 0.006   | 1.36 (1.15-1.61)             | 0.0003 |

Copeptin tertiles are cohort and sex-specific. Cox regression analyses and logistic regression analyses performed separately in individual cohorts. Hazard ratio (HR) and Odds ratio (OR) with 95% confidence interval (CI) for tertiles of plasma copeptin and for 1 unit of log<sub>e</sub>[copeptin], adjusted for sex, age and eGFR at baseline, plus duration of follow-up for KDIGO “Certain drop in eGFR” outcome.

**Supplemental Table 3: Incidence of eGFR outcomes (CKD-EPI cystatin C equation) during follow-up in the PREVEND cohort by tertiles of plasma copeptin at baseline**

| Sex-specific tertiles       | CKD stage 3<br>(eGFR<60 ml/min/1.73m <sup>2</sup> ) |            | KDIGO “Certain drop in eGFR” |            | Rapid kidney function decline |           |
|-----------------------------|-----------------------------------------------------|------------|------------------------------|------------|-------------------------------|-----------|
|                             | No                                                  | Yes        | No                           | Yes        | No                            | Yes       |
| T1                          | 1787 (93.1)                                         | 133 (6.9)  | 1766 (90.1)                  | 195 (9.9)  | 1866 (94.5)                   | 108 (5.5) |
| T2                          | 1745 (90.4)                                         | 185 (9.6)  | 1778 (89.3)                  | 214 (10.7) | 1904 (94.5)                   | 111 (5.5) |
| T3                          | 1574 (84.4)                                         | 226 (12.6) | 1667 (86.2)                  | 268 (13.9) | 2549 (85.8)                   | 159 (8.2) |
|                             | <b>HR (95% CI)</b>                                  | <b>P</b>   | <b>OR (95% CI)</b>           | <b>p</b>   | <b>OR (95% CI)</b>            | <b>p</b>  |
| T3 vs. T1                   | 1.35 (1.09-1.68)                                    | 0.006      | 1.29 (1.05-1.60)             | 0.02       | 1.57 (1.21-2.26)              | 0.0009    |
| T3 vs. T2                   | 1.20 (0.98-1.45)                                    | 0.07       | 1.29 (1.05-1.58)             | 0.01       | 1.39 (1.07-1.81)              | 0.01      |
| T2 vs. T1                   | 1.13 (0.90-1.42)                                    | 0.28       | 1.00 (0.81-1.25)             | 0.97       | 1.13 (0.85-1.50)              | 0.40      |
| Log <sub>e</sub> [copeptin] | 1.16 (1.01-1.33)                                    | 0.04       | 1.19 (1.04-1.37)             | 0.01       | 1.27 (1.07-1.52)              | 0.007     |

Data are n (%). Copeptin tertiles are cohort and sex-specific. Hazard ratio (HR) and Odds ratio (OR) with 95% confidence interval (CI) for sex-specific tertiles of plasma copeptin and for 1 unit of log<sub>e</sub>[copeptin], adjusted for sex, age and eGFR at baseline, plus duration of follow-up (for KDIGO “Certain drop in eGFR” and rapid kidney function decline criteria only).

**Supplemental Table 4: Incidence of eGFR outcomes during follow-up in men by tertiles of plasma copeptin at baseline**

| Sex-specific tertiles       | CKD stage 3<br>(eGFR<60 ml/min/1.73m <sup>2</sup> ) |            | KDIGO “Certain drop in eGFR” |            | Rapid kidney function decline |           |
|-----------------------------|-----------------------------------------------------|------------|------------------------------|------------|-------------------------------|-----------|
|                             | No                                                  | Yes        | No                           | Yes        | No                            | Yes       |
| T1                          | 1985 (94.2)                                         | 121 (5.8)  | 1994 (93.5)                  | 139 (6.5)  | 2066 (96.9)                   | 67 (3.1)  |
| T2                          | 1894 (92.2)                                         | 160 (7.8)  | 1914 (91.0)                  | 190 (9.0)  | 2031 (96.5)                   | 73 (3.5)  |
| T3                          | 1787 (89.7)                                         | 205 (10.3) | 1862 (89.6)                  | 215 (10.4) | 1970 (94.9)                   | 107 (5.2) |
|                             | <b>HR (95% CI)</b>                                  | <b>P</b>   | <b>OR (95% CI)</b>           | <b>P</b>   | <b>OR (95% CI)</b>            | <b>p</b>  |
| T3 vs. T1                   | 1.54 (1.14-1.94)                                    | 0.0001     | 1.64 (1.30-2.06)             | <0.0001    | 1.70 (1.23-2.37)              | 0.008     |
| T3 vs. T2                   | 1.30 (1.06-1.60)                                    | 0.01       | 1.15 (0.93-1.43)             | 0.19       | 1.43 (1.04-1.96)              | 0.03      |
| T2 vs. T1                   | 1.19 (0.94-1.51)                                    | 0.15       | 1.42 (1.13-1.80)             | 0.003      | 1.20 (0.84-1.70)              | 0.31      |
| Log <sub>e</sub> [copeptin] | 1.39 (1.20-1.62)                                    | <0.0001    | 1.35 (1.16-1.56)             | <0.0001    | 1.37 (1.10-1.71)              | 0.005     |

Data are n (%). Copeptin tertiles are cohort and sex-specific. Cox regression analysis and logistic regression analyses performed in pooled cohorts. Hazard ratio (HR) and Odds ratio (OR) with 95% confidence interval (CI) for sex-specific tertiles of plasma copeptin and for 1 unit of log<sub>e</sub>[copeptin], adjusted for cohort membership, sex, age and eGFR at baseline, plus duration of follow-up (for KDIGO “Certain drop in eGFR” and rapid kidney function decline criteria only). eGFR was calculated using the CKD-EPI creatinine equation.

**Supplemental Table 5: Incidence of eGFR outcomes during follow-up in women by tertiles of plasma copeptin at baseline**

| Sex-specific tertiles       | CKD stage 3<br>(eGFR<60 ml/min/1.73m <sup>2</sup> ) |            | KDIGO “Certain drop in eGFR” |            | Rapid kidney function decline |           |
|-----------------------------|-----------------------------------------------------|------------|------------------------------|------------|-------------------------------|-----------|
|                             | No                                                  | Yes        | No                           | Yes        | No                            | Yes       |
| T1                          | 2146 (92.3)                                         | 179 (7.7)  | 2254 (92.5)                  | 184 (7.5)  | 2357 (96.7)                   | 81 (3.3)  |
| T2                          | 2104 (91.2)                                         | 204 (8.8)  | 2204 (90.3)                  | 237 (9.7)  | 2326 (95.3)                   | 115 (4.7) |
| T3                          | 1993 (88.7)                                         | 255 (11.3) | 2136 (88.9)                  | 268 (11.2) | 2267 (94.3)                   | 137 (5.7) |
|                             | <b>HR (95% CI)</b>                                  | <b>P</b>   | <b>OR (95% CI)</b>           | <b>P</b>   | <b>OR (95% CI)</b>            | <b>p</b>  |
| T3 vs. T1                   | 1.46 (1.21-1.78)                                    | <0.0001    | 1.60 (1.31-1.96)             | <0.0001    | 1.82 (1.36-2.46)              | <0.0001   |
| T3 vs. T2                   | 1.27 (1.06-1.53)                                    | 0.01       | 1.20 (0.99-1.44)             | 0.06       | 1.12 (0.85-1.47)              | 0.42      |
| T2 vs. T1                   | 1.15 (0.94-1.41)                                    | 0.18       | 1.34 (1.09-1.65)             | 0.005      | 1.63 (1.21-2.21)              | 0.001     |
| Log <sub>e</sub> [copeptin] | 1.33 (1.17-1.51)                                    | <0.0001    | 1.45 (1.27-1.65)             | <0.0001    | 1.48 (1.22-1.80)              | <0.0001   |

Data are n (%). Copeptin tertiles are cohort and sex-specific. Cox regression analysis and logistic regression analyses performed in pooled cohorts. Hazard ratio (HR) and Odds ratio (OR) with 95% confidence interval (CI) for sex-specific tertiles of plasma copeptin and for 1 unit of log<sub>e</sub>[copeptin], adjusted for cohort membership, sex, age and eGFR at baseline, plus duration of follow-up (for KDIGO “Certain drop in eGFR” and rapid kidney function decline criteria only). eGFR was calculated using the CKD-EPI creatinine equation.
